# Supplementary material for: “Cold-Dry” and “Cold-Wet” Events in the Late Holocene, Southern Russian Far East
Source: MDPI journal article supplement (doi:10.3390/cli11040091), 2023-04-20
Supplement: s1 [file s1]

**Table S1.** Proxy records used in this study. Site number as in Figure 2.

| N                       | Site name                                           | Type of section                                  | Lat, N      | Long, E      | Elevation, m a.s.l. | Proxies used | Dating method           | References    |
|-------------------------|-----------------------------------------------------|--------------------------------------------------|-------------|--------------|---------------------|--------------|-------------------------|---------------|
| <b>Continental area</b> |                                                     |                                                  |             |              |                     |              |                         |               |
| 1                       | Bikin River                                         | Dillalakchi peat bog                             | 46°40.945'  | 136°10.276'  | 145                 | d,p,b        | <sup>14</sup> C         | [63]          |
| 2                       | Bikin River                                         | Krasny Yar peat bog                              | 46°31.185'  | 135°19.462'  | 130                 | d,p,b        | <sup>14</sup> C         | [63]          |
| 3                       | Bikin River                                         | Sakhalin Mire, peat bog                          | 46°31.557'  | 134°33.675'  | 68                  | d,p,b        | <sup>14</sup> C         | [34]          |
| 4                       | Bikin River                                         | Sakhalin Mire, peat bog                          | 46°29.247'  | 134°28.896'  | 63                  | d,p,b        | <sup>14</sup> C         | [34]          |
| 5                       | Bolshaya Ussurka River                              | Meteoritny peat bog                              | 46°06.845'  | 134°37.344'  | 90                  | d,p,b        | <sup>14</sup> C         | [35]          |
| 6                       | Bolshaya Ussurka River                              | Zveriny peat bog                                 | 45°48.781'  | 134°36.843'  | 117                 | d,p          | <sup>14</sup> C         | [35]          |
| 7                       | Bolshaya Ussurka River                              | Glubinnoe peat bog                               | 46°03.826'  | 135°22.506'  | 210                 | d,p,b        | <sup>14</sup> C         | [35]          |
| 8                       | Izyubrine Solontsi Lake                             | Lacustrine/mire complex                          | 45°27.111'  | 136°34.366'  | 750                 | d,p,b        | <sup>14</sup> C         | [49]          |
| 9                       | Nizhnee Lake                                        | Lacustrine/mire complex                          | 45°25.393'  | 136°30.976'  | 565                 | d,b          | <sup>14</sup> C         | [49]          |
| 10                      | Langou I Bay                                        | Lacustrine/mire complex                          | 44°25.169'  | 135°54.435'  | 2                   | d,p,ch       | <sup>14</sup> C         | [32]          |
| 11                      | Muta Mire                                           | Peat bog                                         | 43°34.812'  | 134°09.701'  | 568                 | d,p          | <sup>14</sup> C         | [61]          |
| 12                      | Ugolnyy Creek, Milogradovka (Vanchin) River         | Lacustrine/mire complex                          | 43°31.749'  | 134°13.357'  | 445                 | d,b          | <sup>14</sup> C, tephra | [62]          |
| 13                      | Kit Bay                                             | Lagoon/lacustrine/mire complex                   | 43°04.380'  | 134°11.157'  | 2.5                 | d,p          | <sup>14</sup> C, tephra | [73]          |
| 14                      | Olkhovaya Mt., Alekseevskoe Lake                    | Lacustrine/mire complex                          | 43°20.545'  | 133°39.348'  | 1600                | d,p          | <sup>14</sup> C         | Present study |
| 15                      | Sergeev Plateau, eastern paleolake                  | Lacustrine/mire complex                          | 43° 31.404' | 133°28.860'  | 884                 | d,p,b        | <sup>14</sup> C, tephra | [60]          |
| 16                      | Sergeev Plateau, western paleolake                  | Lacustrine/mire complex                          | 43° 31.537' | 133°28.148'  | 887                 | d,p,b        | <sup>14</sup> C, tephra | [60]          |
| 17                      | Shkotovskoe Plateau                                 | Lacustrine/mire complex                          | 43° 27.361' | 132°49.379'  | 740                 | d,p          | <sup>14</sup> C, tephra | [59]          |
| 18                      | Shkotovskoe Plateau                                 | Lacustrine/mire complex                          | 43°46.453'  | 132° 80.936' | 734                 | d,p          | <sup>14</sup> C, tephra | [59]          |
| 19                      | Steklyanukha River, Shkotovka River Basin           | Fluvial deposits                                 | 43°21.451'  | 132°29.220'  | 60                  | d,p          | <sup>14</sup> C         | [66]          |
| 20                      | Cherepash'e Lake                                    | Lacustrine/mire complex                          | 43°17.341'  | 132°17.135'  | 1                   | d,p          | <sup>14</sup> C, tephra | [70]          |
| 21                      | Krasnaya Bay, Russian Island                        | Lacustrine/mire complex                          | 42°59.061'  | 131°47.107'  | 2                   | d,p          | <sup>14</sup> C         | [170]         |
| 22                      | Paleolake near Utinoe Lake, Amutsky Bay             | Lacustrine/mire complex                          | 43°23.947'  | 131°44.511'  | 2                   | d,p,b        | <sup>14</sup> C, tephra | [67]          |
| 23                      | Shufan Plateau                                      | Lacustrine/mire complex                          | 43°22.551'  | 131°33.005'  | 320                 | d,p,b        | <sup>14</sup> C, tephra | [33]          |
| 24                      | Starorechenskoe Fortress, Razdolnaya (Suifun) River | Fortress on flood plain                          | 43°54.010'  | 131°43.543'  | 37                  | d,p          | <sup>14</sup> C         | [65]          |
| <b>Sakhalin Island</b>  |                                                     |                                                  |             |              |                     |              |                         |               |
| 25                      | Vladimirovo Settlement                              | Peat bog                                         | 49°16.313'  | 143°57.994'  | 15                  | p,b          | <sup>14</sup> C         | [73]          |
| 26                      | Izilmietieva Bay, Oroless River                     | Peat bog                                         | 48°55.619'  | 141°59.269'  | 6                   | d,p          | <sup>14</sup> C         | [52]          |
| 27                      | Naiba River Basin                                   | Peat bog on watershed with loam layers of floods | 47°19.453'  | 142°46.237'  | 4                   | d            | <sup>14</sup> C         | [50]          |
| 28                      | Yablochnaya River Basin                             | Peat bog with loam layers of floods              | 47°09.947'  | 142°04.344'  | 2                   |              | <sup>14</sup> C         | Present study |
| <b>Kuril islands</b>    |                                                     |                                                  |             |              |                     |              |                         |               |
| 29                      | Shiashkotan Island                                  | Peat bog                                         | 48°46.873'  | 154°02.046'  | 60                  | p            | <sup>14</sup> C         | [111]         |

|    |                                                  |                             |             |             |     |        |                         |               |
|----|--------------------------------------------------|-----------------------------|-------------|-------------|-----|--------|-------------------------|---------------|
| 30 | Matua Island,                                    | Soil-pyroclastic sequences  | 48°03.875'  | 153°15.340' | 63  | d,p    | <sup>14</sup> C, tephra | [115]         |
| 31 | Matua Island, Ainu Bay                           | Peat bog                    | 48°02.683'  | 153°13.756' | 10  | p      | <sup>14</sup> C, tephra | [115]         |
| 32 | Rasshua Island                                   | Peat bog in ancient caldera | 47°43.195'  | 153°00.125' | 106 | d,p,b  | <sup>14</sup> C, tephra | [111]         |
| 33 | Ketoi Island                                     | Peat bog                    | 47°18.008'  | 152°30.629' | 70  | d,p    | <sup>14</sup> C, tephra | [111]         |
| 34 | Urup Island, Novokurilskaya Bay                  | Dune field                  | 46°12.652'' | 150°19.118' | 13  | p      | <sup>14</sup> C, tephra | [114]         |
| 35 | Urup Island, Osma Bay                            | Lacustrine/swamp complex    | 45°35.068'  | 149°26.813' | 7.5 | d,p    | <sup>14</sup> C, tephra | [86]          |
| 36 | Iturup Island, Lebedinoe Lake                    | Lacustrine/swamp complex    | 45°13.874'  | 147°53.442' | 3   | d,p,ch | <sup>14</sup> C, tephra | [85]          |
| 37 | Iturup Island, plateau near Gniloe Lake          | Lacustrine/swamp complex    | 45°08.862'  | 147°58.353' | 400 | d,p    | <sup>14</sup> C, tephra | [84]          |
| 38 | Kunashir Island, South-Kuril Isthmus             | Peat bog                    | 44°02.980'  | 145°50.736' | 4.4 | p,b    | <sup>14</sup> C, tephra | [78]          |
| 39 | Kunashir Island, paleolake near Golovnin volcano | Lacustrine/swamp complex    | 43°48.003'  | 145°34.081' | 32  | d,p    | <sup>14</sup> C, tephra | [77]          |
| 40 | Shikotan Island, Khromova Bay                    | Lacustrine/swamp complex    | 43°52.189'  | 146°48.409' | 3.6 | d,p,ch | <sup>14</sup> C, tephra | [80]          |
| 41 | Shikotan Island, Gorobets River Basin            | Valley peat bog             | 43°48.741'  | 146°43.004' | 10  | p      | <sup>14</sup> C, tephra | [111]         |
| 42 | Zelenyi Island                                   | Lacustrine/swamp complex    | 43°28.879'  | 146°10.822' | 6.8 | d      | <sup>14</sup> C, tephra | [76]          |
| 43 | Tanfiliev Island                                 | Peat bog on the bench       | 43°25.459'  | 145°53.551' | 1.7 | p      | tephra                  | Present study |

d – diatoms, p – pollen, b – botanical composition, ch –chironomid
